# Supplementary material for: Adapting the FAST-M maternal sepsis intervention for implementation in Pakistan: a qualitative exploratory study
Source: HighWire-hosted journal article supplement (doi:10.1136/bmjopen-2021-059273), 2022-09-01
Supplement: bmjopen-2021-059273supp005_data_supplement.pdf [file bmjopen-2021-059273supp005_data_supplement.pdf]

**FORM 1: FACILITY AUDIT****FACILITY VISIT ID:**

|   |   |   |   |   |   |   |   |
|---|---|---|---|---|---|---|---|
| □ | □ | □ | □ | – | □ | □ | □ |
|---|---|---|---|---|---|---|---|

Facility ID e.g.  
UWK, KAB etc.

Visit ID e.g.  
001, 002 etc.

Today's Date: 

|   |   |
|---|---|
| d | d |
|---|---|

 – 

|   |   |
|---|---|
| m | m |
|---|---|

 – 

|   |   |   |   |
|---|---|---|---|
| y | y | y | y |
|---|---|---|---|

 Time: 

|   |   |
|---|---|
| □ | □ |
|---|---|

 : 

|   |   |
|---|---|
| □ | □ |
|---|---|

Date previous form completed (or if first Visit, date study opened at this site):

|   |   |   |   |   |   |   |   |   |   |
|---|---|---|---|---|---|---|---|---|---|
| d | d | – | m | m | – | y | y | y | y |
|---|---|---|---|---|---|---|---|---|---|

Are you collecting the data during the baseline or intervention phase?

Baseline

Intervention

3. How many of the following **MATERNAL OUTCOMES** have you had since the last visit?

| Maternal Outcome                                                   | Number |
|--------------------------------------------------------------------|--------|
| Maternal Sepsis                                                    |        |
| Maternal Deaths                                                    |        |
| Post-Partum haemorrhage (>1L)                                      |        |
| Ante-Partum haemorrhage (>50ml)                                    |        |
| Severe pre-eclampsia/eclampsia (>160/110 and >2+ protein in urine) |        |
| Blood transfusions                                                 |        |

4. How many of the following **NEONATAL OUTCOMES** have you had since the last visit?

| Neonatal Outcome                               | Number |
|------------------------------------------------|--------|
| Live Births                                    |        |
| Neonatal deaths before discharge from hospital |        |
| Babies requiring antibiotics                   |        |
| Still births                                   |        |

**FORM 1: FACILITY AUDIT****FACILITY VISIT ID:**

|  |  |  |  |  |  |  |  |
|--|--|--|--|--|--|--|--|
|  |  |  |  |  |  |  |  |
|--|--|--|--|--|--|--|--|

Facility ID e.g.  
UWK, KAB etc.

Visit ID e.g.  
001, 002 etc.

5. How many of the following **RESOURCES** are available today?

| Resource                                 | Availability             |                          |                          |
|------------------------------------------|--------------------------|--------------------------|--------------------------|
|                                          | Good *                   | Limited                  | None                     |
| Types of IV fluid:                       |                          |                          |                          |
| A) 0.9% Saline                           | <input type="checkbox"/> | <input type="checkbox"/> | <input type="checkbox"/> |
| B) Ringers Lactate                       | <input type="checkbox"/> | <input type="checkbox"/> | <input type="checkbox"/> |
| Type of oral antibiotics:                |                          |                          |                          |
| A) Amoxicillin                           | <input type="checkbox"/> | <input type="checkbox"/> | <input type="checkbox"/> |
| B) Augmentin                             | <input type="checkbox"/> | <input type="checkbox"/> | <input type="checkbox"/> |
| C) Cephalosporin (e.g. Cefalexin)        | <input type="checkbox"/> | <input type="checkbox"/> | <input type="checkbox"/> |
| D) Cefixime                              | <input type="checkbox"/> | <input type="checkbox"/> | <input type="checkbox"/> |
| E) Ciprofloxacin                         | <input type="checkbox"/> | <input type="checkbox"/> | <input type="checkbox"/> |
| F) Clindamycin                           | <input type="checkbox"/> | <input type="checkbox"/> | <input type="checkbox"/> |
| G) Doxycycline                           | <input type="checkbox"/> | <input type="checkbox"/> | <input type="checkbox"/> |
| H) Erythromycin                          | <input type="checkbox"/> | <input type="checkbox"/> | <input type="checkbox"/> |
| I) Metronidazole                         | <input type="checkbox"/> | <input type="checkbox"/> | <input type="checkbox"/> |
| J) Other (please state):                 | <input type="checkbox"/> | <input type="checkbox"/> |                          |
| Type of IM / IV antibiotics:             |                          |                          |                          |
| A) Ampicillin                            | <input type="checkbox"/> | <input type="checkbox"/> | <input type="checkbox"/> |
| B) Penicillin G                          | <input type="checkbox"/> | <input type="checkbox"/> | <input type="checkbox"/> |
| C) Cefazolin                             | <input type="checkbox"/> | <input type="checkbox"/> | <input type="checkbox"/> |
| D) Cephalosporin (e.g. ceftriazone etc.) | <input type="checkbox"/> | <input type="checkbox"/> | <input type="checkbox"/> |
| E) Ciprofloxacin                         | <input type="checkbox"/> | <input type="checkbox"/> | <input type="checkbox"/> |
| F) Clindamycin                           | <input type="checkbox"/> | <input type="checkbox"/> | <input type="checkbox"/> |

**FORM 1: FACILITY AUDIT****FACILITY VISIT ID:**

|                      |                      |                      |                      |                      |                      |
|----------------------|----------------------|----------------------|----------------------|----------------------|----------------------|
| <input type="text"/> | <input type="text"/> | <input type="text"/> | <input type="text"/> | <input type="text"/> | <input type="text"/> |
|----------------------|----------------------|----------------------|----------------------|----------------------|----------------------|

Facility ID e.g. UWK, KAB etc.      Visit ID e.g. 001, 002 etc.

|                          |                          |                          |                          |
|--------------------------|--------------------------|--------------------------|--------------------------|
| G) Gentamycin            | <input type="checkbox"/> | <input type="checkbox"/> | <input type="checkbox"/> |
| H) Metronidazole         | <input type="checkbox"/> | <input type="checkbox"/> | <input type="checkbox"/> |
| I) Vancomycin            | <input type="checkbox"/> | <input type="checkbox"/> | <input type="checkbox"/> |
| J) Other (please state): | <input type="checkbox"/> | <input type="checkbox"/> |                          |

\* Good availability defined as a supply that is unlikely to run out before the next anticipated delivery

| Resource                                                             | Availability             |                          |                          |
|----------------------------------------------------------------------|--------------------------|--------------------------|--------------------------|
|                                                                      | Good *                   | Limited                  | None                     |
| Equipment for IV line (cannula, dressings etc)                       | <input type="checkbox"/> | <input type="checkbox"/> | <input type="checkbox"/> |
| Malaria tests                                                        | <input type="checkbox"/> | <input type="checkbox"/> | <input type="checkbox"/> |
| Functioning theatre and staff able to remove source of infection     | <input type="checkbox"/> | <input type="checkbox"/> | <input type="checkbox"/> |
| Adequate means to transport to transfer patients for specialist care | <input type="checkbox"/> | <input type="checkbox"/> | <input type="checkbox"/> |
| Working thermometers                                                 | <input type="checkbox"/> | <input type="checkbox"/> | <input type="checkbox"/> |
| Working BP machines                                                  | <input type="checkbox"/> | <input type="checkbox"/> | <input type="checkbox"/> |
| Working O2 saturation machines                                       | <input type="checkbox"/> | <input type="checkbox"/> | <input type="checkbox"/> |
| Fetoscopes / Pinnards / fetal stethoscopes                           | <input type="checkbox"/> | <input type="checkbox"/> | <input type="checkbox"/> |
| Clocks / watches                                                     | <input type="checkbox"/> | <input type="checkbox"/> | <input type="checkbox"/> |
| Spare batteries                                                      | <input type="checkbox"/> | <input type="checkbox"/> | <input type="checkbox"/> |
| FAST-M Observation charts *1                                         | <input type="checkbox"/> | <input type="checkbox"/> | <input type="checkbox"/> |
| FAST-M Decision tools *1                                             | <input type="checkbox"/> | <input type="checkbox"/> | <input type="checkbox"/> |
| FAST-M Treatment tools *1                                            | <input type="checkbox"/> | <input type="checkbox"/> | <input type="checkbox"/> |
| FAST-M Referral letter *1                                            | <input type="checkbox"/> | <input type="checkbox"/> | <input type="checkbox"/> |

\* Good availability defined as a supply that is unlikely to run out before the next anticipated delivery

\*<sup>1</sup> only applicable if completing form during the intervention phase

**FORM 1: FACILITY AUDIT**

**FACILITY VISIT ID:**  -

*Facility ID e.g.  
UWK, KAB etc.*

*Visit ID e.g.  
001, 002 etc.*

Completed by: \_\_\_\_\_

Role: \_\_\_\_\_

Signature: \_\_\_\_\_

Date: *DD / MMM / YYYY*

*You must have signed the Site Signature & Delegation Log*
